# Supplementary material
Source: Frontiers journal article supplement (https://www.frontiersin.org/articles/469029)
Supplement: Data_Sheet_4.PDF [file Data_Sheet_4.PDF]

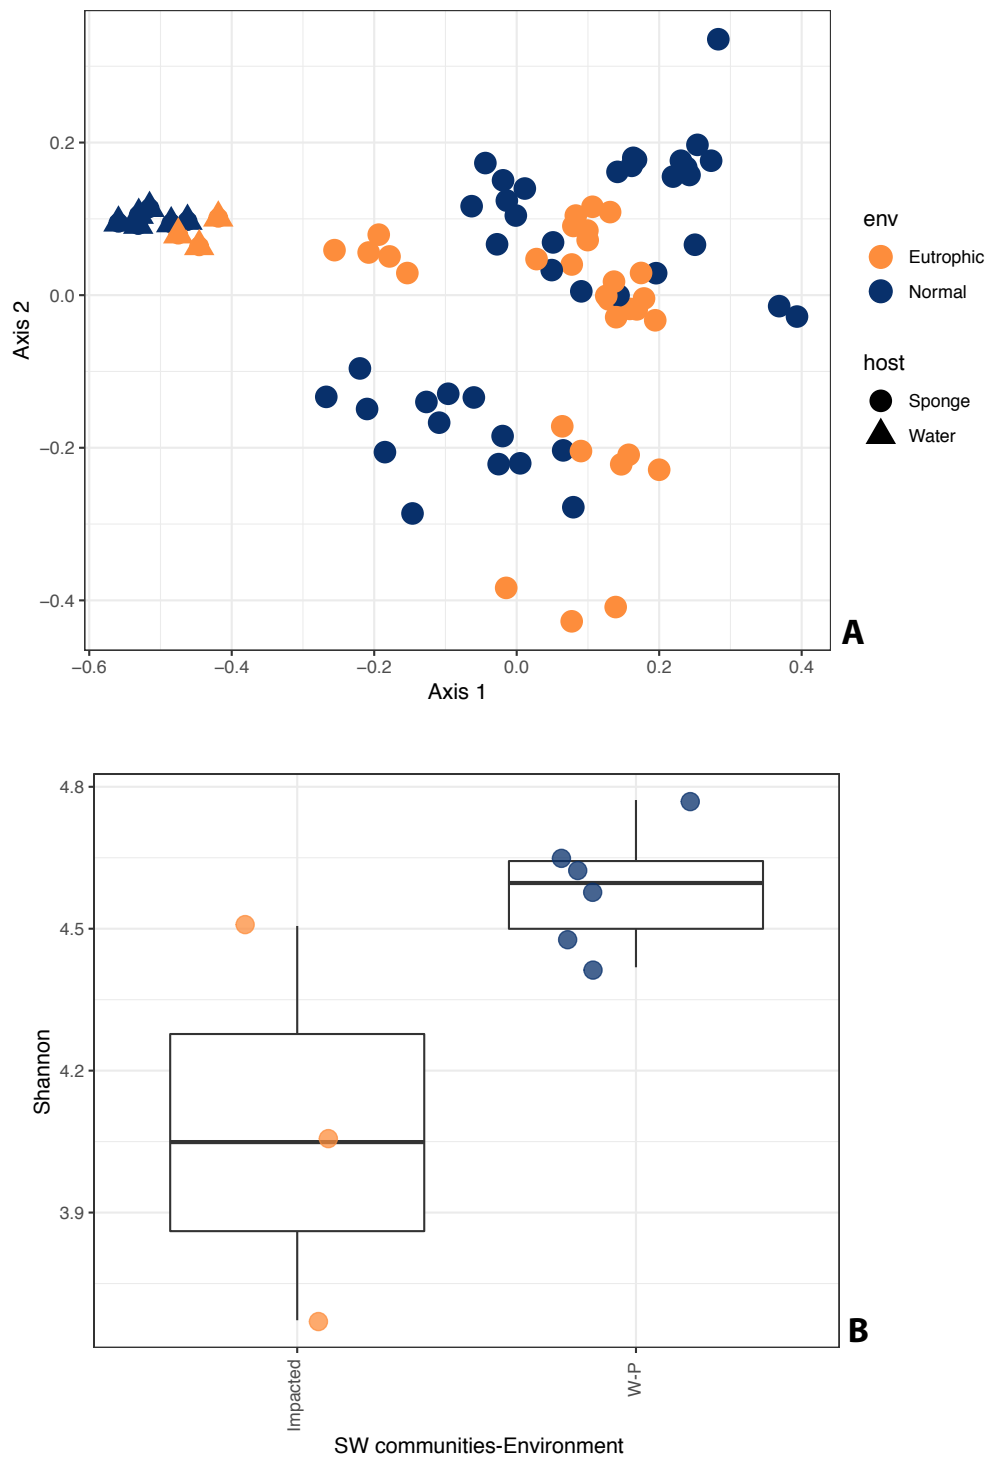

**Figure S4.** A) Non-metric multidimensional scaling (nMDS) ordination of the sponge bacterial communities and sea-water bacterial samples based on Bray-Curtis distances coloured by their belonging to impacted (orange) or well-preserved (blue) environment. B) Box plot of the Shannon diversity indices of sea water bacterial communities from the impacted (orange) or well-preserved (blue) environments. Water samples were collected during the same sampling dates as the study sponges (see Turon et al. (2018) for raw data).
